# Supplementary material for: Torsional behaviors of polymer-infiltrated carbon nanotube yarn muscles studied with atomic force microscopy
Source: Royal Society of Chemistry journal article supplement (doi:10.1039/c4nr05184j), 2014-12-08
Supplement: c4nr05184j1.pdf [file c4nr05184j1.pdf]

**Electronic Supplementary Information for**  
**Torsional Behaviors of Polymer-infiltrated Carbon Nanotube**  
**Yarn Muscles by Atomic Force Microscope†**

Cheong Hoon Kwon,<sup>a</sup> Kyoung-Yong Chun,<sup>a</sup> Shi Hyeong Kim,<sup>a</sup> Jae-Hyeok Lee,<sup>b</sup> Jae-Ho Kim,<sup>b</sup> Márcio D. Lima,<sup>c</sup> Ray H. Baughman<sup>c</sup> and Seon Jeong Kim<sup>\*a</sup>

<sup>a</sup> Center for Bio-Artificial Muscle and Department of Biomedical Engineering, Hanyang University, Seoul, 133-791, Korea. *E-mail:* [sjk@hanyang.ac.kr](mailto:sjk@hanyang.ac.kr)

<sup>b</sup> Department of Molecular Science and Technology, Ajou University, Suwon, 443-749, Korea.

<sup>c</sup> The Alan G. MacDiarmid NanoTech Institute, University of Texas at Dallas, Richardson, TX 75083, USA.

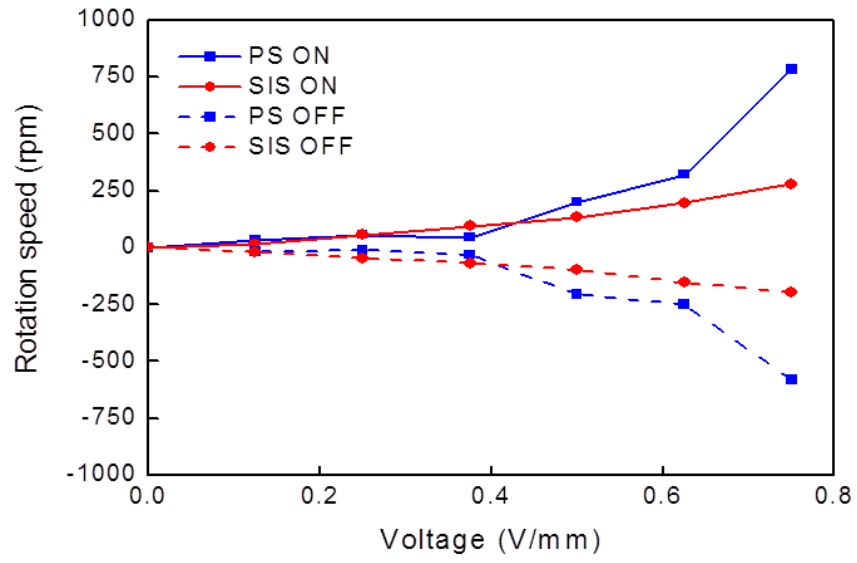

**Fig. S1** Rotation speed, revolutions per minute (rpm) changes depending on the voltage for PS-infiltrated CNT and SIS-infiltrated CNT torsional yarn muscles.

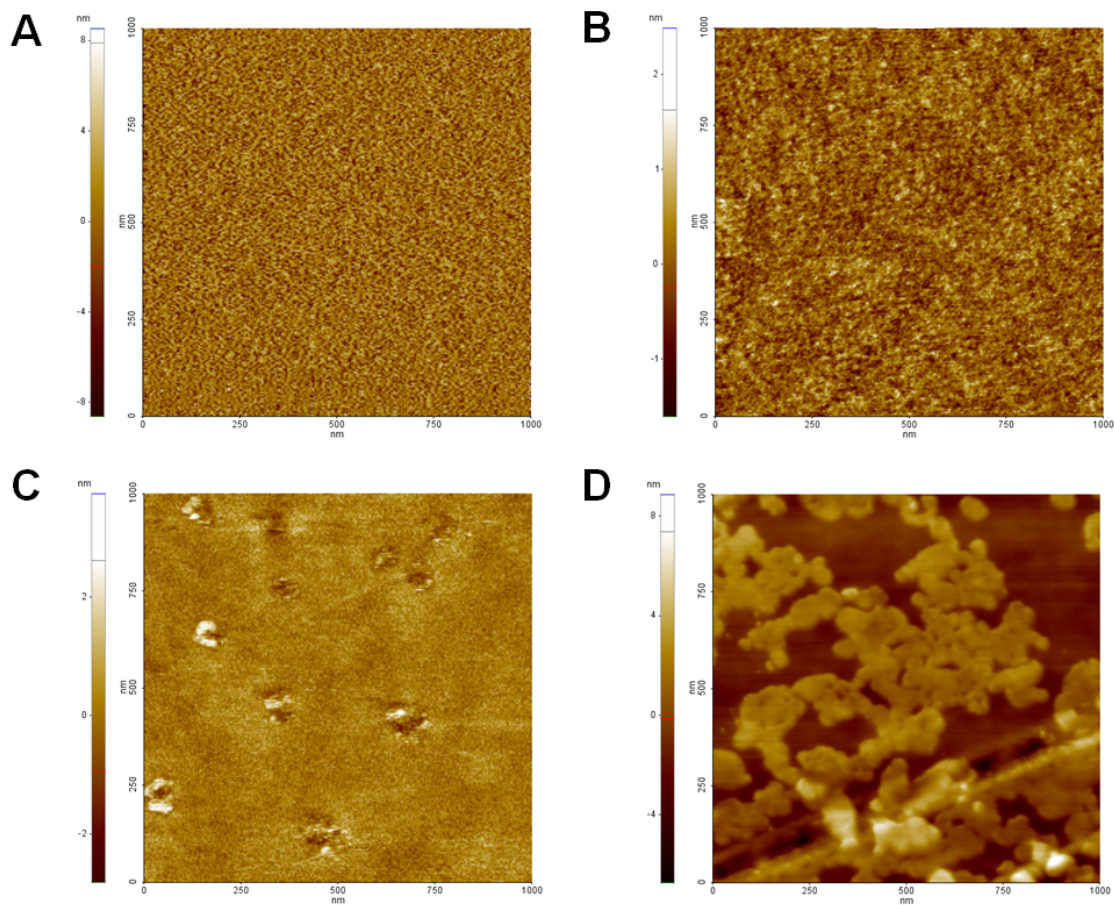

**Fig. S2** AFM topographic images of PS as a function of temperature. (A) room temperature, (B) 40 °C, (C) 80 °C, and (D) 150 °C.

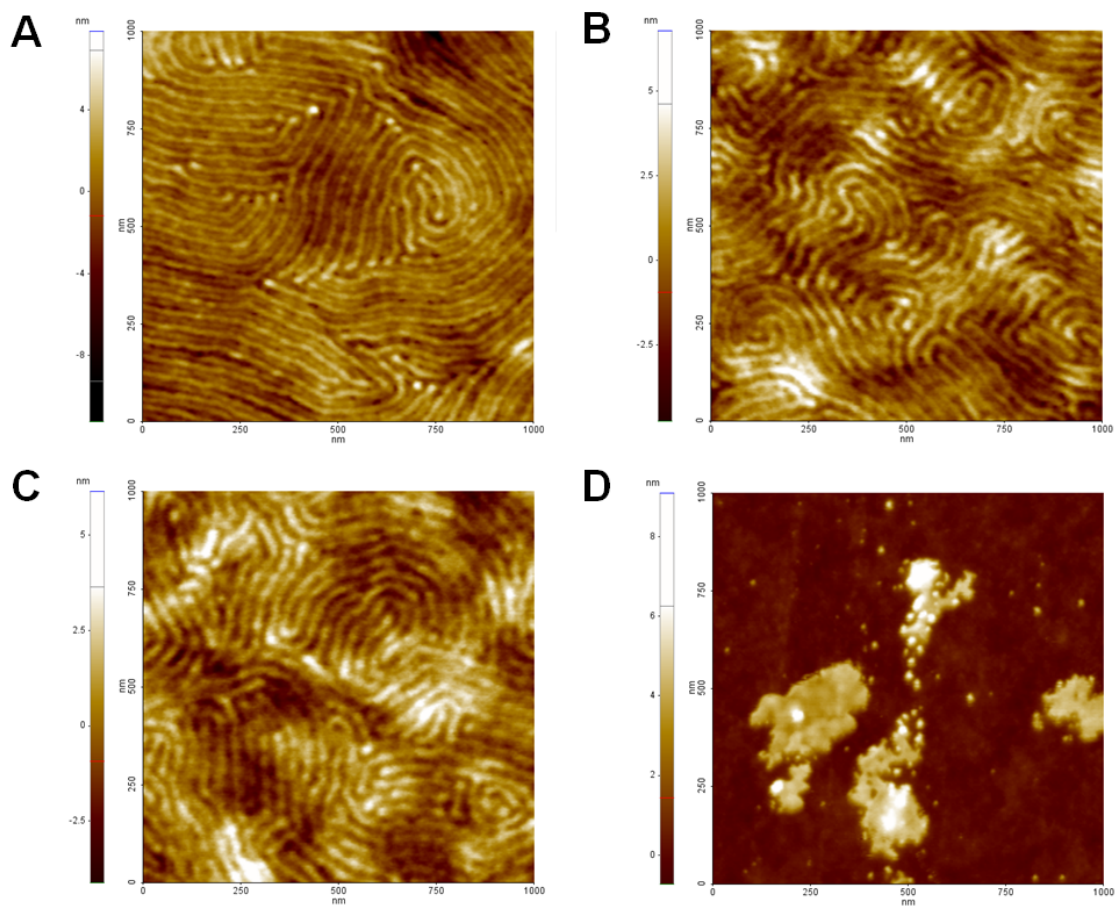

**Fig. S3** AFM topographic images of SIS as a function of temperature. (A) room temperature, (B) 40 °C, (C) 80 °C, and (D) 150 °C.

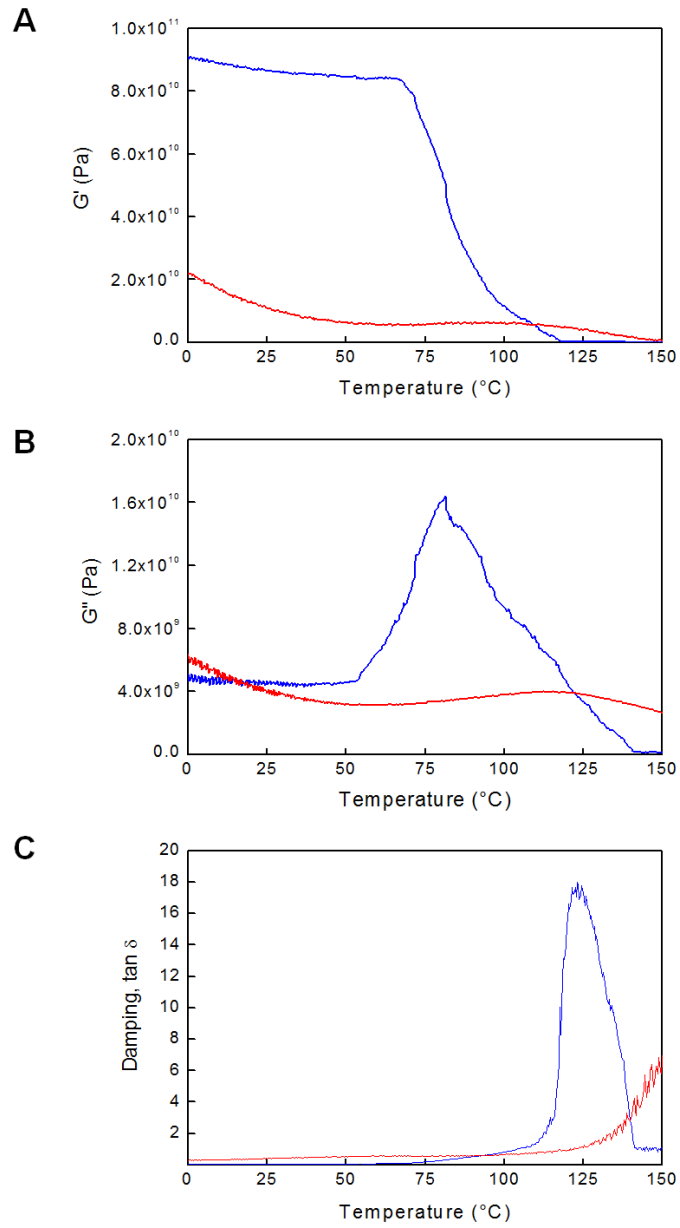

**Fig. S4** Dynamic mechanical analyzer results to verify the torsional performance of PS-infiltrated CNT yarn (blue line) and SIS-infiltrated CNT yarn (red line) at 1 Hz. (A) Temperature dependence of storage modulus,  $G'$ . (B) Loss modulus,  $G''$  for PS and SIS-infiltrated CNT torsional yarn muscles. (C) Tangent  $\delta$  for PS-infiltrated CNT yarn muscles and SIS-infiltrated CNT torsional yarn muscles.

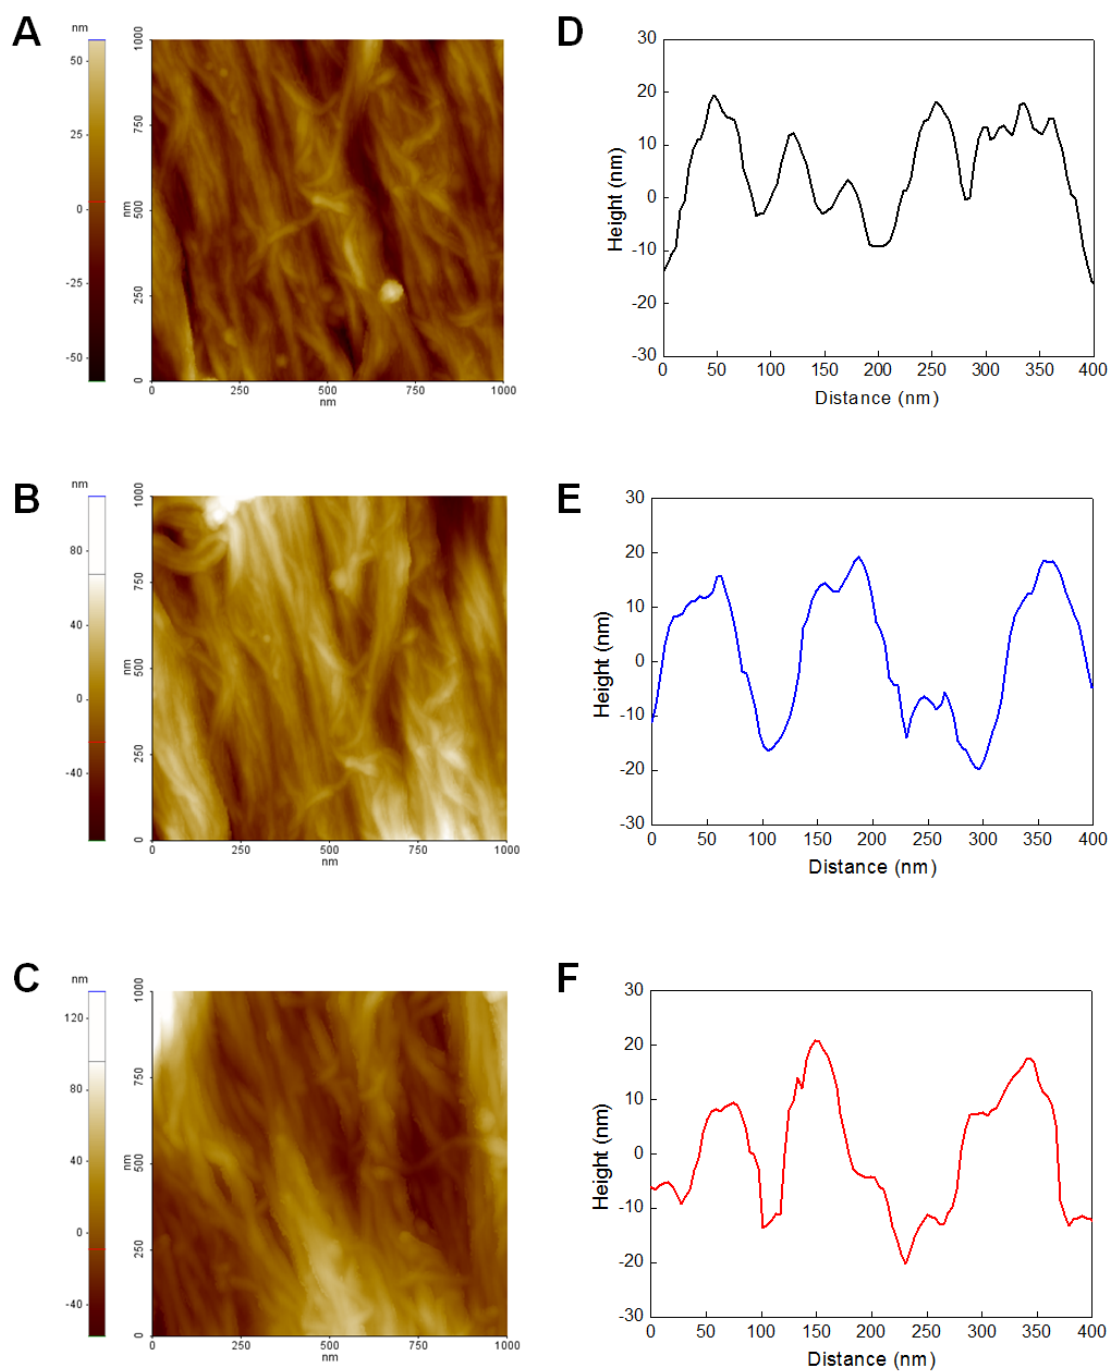

**Figure S5.** AFM surface morphologies (for 1- $\mu\text{m}$  square grid) of polymer-infiltrated CNT torsional yarn muscles at 25  $^{\circ}\text{C}$ . Topographic images and height distributions for polymer-infiltrated CNT yarns. (A and D) Guest-free CNT yarn. (B and E) PS-infiltrated CNT yarn, (C and F) SIS-infiltrated CNT yarn.
